1        **Antigen-specific humoral immune responses by CRISPR/Cas9-edited B cells**

2

3        Harald Hartweger<sup>1</sup>, Andrew T. McGuire<sup>2,3</sup>, Marcel Horning<sup>1</sup>, Justin J. Taylor<sup>2,3,4</sup>, Pia

4        Dosenovic<sup>1</sup>, Daniel Yost<sup>1</sup>, Anna Gazumyan<sup>1</sup>, Michael S. Seaman<sup>5</sup>, Leonidas

5        Stamatatos<sup>2</sup>, Mila Jankovic<sup>1</sup> and Michel C. Nussenzweig<sup>1,6\*</sup>

6

7        <sup>1</sup>Laboratory of Molecular Immunology, The Rockefeller University, New York, NY 10065,

8        USA.

9        <sup>2</sup>Vaccine and Infectious Disease Division, Fred Hutchinson Cancer Research Center,

10       Seattle, WA 98109, USA

11       <sup>3</sup>University of Washington, Department of Global Health, Seattle, WA 98195, USA

12       <sup>4</sup>University of Washington, Department of Immunology, Seattle, WA 98109, USA

13       <sup>5</sup>Center for Virology and Vaccine Research Beth Israel Deaconess Medical Center,

14       Boston, MA 02115, USA

15       <sup>6</sup>Howard Hughes Medical Institute (HHMI), The Rockefeller University, New York, NY

16       10065, USA.

17       \*Corresponding author. Email: nussen@rockefeller.edu

18

19       **Short title:** CRISPR/Cas9-edited anti-HIV B cells

20

21       **One-sentence summary:** B cells edited by CRISPR/Cas9 to produce antibodies

22       participate in humoral immune reactions and secrete neutralizing serum titers of anti-HIV

23       bNAbs.

24 **Abstract**

25 A small number of HIV-1 infected individuals develop broadly neutralizing-antibodies to  
26 the virus (bNAbs). These antibodies are protective against infection in animal models.  
27 However, they only emerge 1 - 3 years after infection, and show a number of highly  
28 unusual features including exceedingly high levels of somatic mutations. It is therefore  
29 not surprising that elicitation of protective immunity to HIV-1 has not yet been possible.  
30 Here we show that mature, primary mouse and human B cells can be edited *in vitro*  
31 using CRISPR/Cas9 to express mature bNAbs from the endogenous *Igh* locus.  
32 Moreover, edited B cells retain the ability to participate in humoral immune responses.  
33 Immunization with cognate antigen in wild type mouse recipients of edited B cells elicits  
34 bNAb titers that neutralize HIV-1 at levels associated with protection against infection.  
35 This approach enables humoral immune responses that may be difficult to elicit by  
36 traditional immunization.

37 **Main text**

38 Although a vaccine for HIV remains elusive, anti-HIV-1 bNAbs have been identified and  
39 their protective activity has been demonstrated in animal models<sup>1-4</sup>. These antibodies  
40 are effective in suppressing viremia in humans and large-scale clinical trials to test their  
41 efficacy in prevention are currently under way<sup>2, 5-12</sup>. However, these antibodies typically  
42 have one or more unusual characteristics including high levels of somatic hypermutation  
43 (SHM), long or very short complementarity determining regions (CDRs) and self-  
44 reactivity that interfere with their elicitation by traditional immunization.

45  
46 Consistent with their atypical structural features, antibodies that broadly neutralize HIV-  
47 1 have been elicited in camelids, cows and transgenic mice with unusual pre-existing  
48 antibody repertoires<sup>13-18</sup>. However, even in transgenic mice that carry super-physiologic  
49 frequencies of bNAb precursors, antibody maturation required multiple immunizations  
50 with a number of different sequential immunogens. Moreover, bNAbs only developed for  
51 one of the epitopes targeted<sup>15, 17, 18</sup>. Consequently, elicitation of bNAbs in primates or  
52 humans remains a significant challenge.

53  
54 To bypass this issue, we developed a method to reprogram mature B cells to express  
55 an anti-HIV-1 bNAb. Adoptive transfer of the engineered B cells and immunization with  
56 a single cognate antigen led to germinal center formation and antibody production at  
57 levels consistent with protection.

58

## 59 **Results**

### 60 **Expressing antibodies in primary mature, murine B cells.**

61 To edit mature B cells efficiently, they need to be activated and cultured *in vitro*. To  
62 determine whether such cells can participate in humoral immune responses *in vivo* we  
63 used *Igh<sup>a</sup>* CD45.1 B cells carrying the *B1-8<sup>hi</sup>* heavy chain that are specific for the hapten  
64 4-hydroxy-3-nitro-phenylacetyl (NP)<sup>19</sup>. B1-8<sup>hi</sup> B cells were activated *in vitro* with anti-  
65 RP105 antibody for 1 - 2 days and subsequently transferred into congenically marked  
66 (*Igh<sup>b</sup>* CD45.2) C57BL/6J mice. Recipients immunized with NP conjugated to ovalbumin  
67 (NP-OVA) developed GCs containing large numbers of the antigen-specific, transferred  
68 B cells (Supplementary Fig. 1a,b) and produced high levels of antigen-specific IgG1  
69 (Supplementary Fig. 1c). In addition, transfection by electroporation did not affect the  
70 ability of transferred cells to enter GCs (Supplementary Fig. 1d,e).

71

72 Despite having two alleles for each of the antibody chains, B cells express only one  
73 heavy and one light chain gene, a phenomenon referred to as allelic exclusion<sup>20-22</sup>.  
74 Introducing additional antibody genes would risk random combinations of heavy and  
75 light chains some of which could be self-reactive or incompatible. Thus, deletion of the  
76 endogenous chains would be desirable to prevent expression of chimeric B cell  
77 receptors (BCRs) composed of the transgene and the endogenous antibody genes. To  
78 do so, we combined endogenous Ig disruption with insertion of a transcription unit that  
79 directs expression of the heavy and light chain into the endogenous heavy chain locus.

80

81 CRISPR-RNAs (crRNAs) were designed to ablate the  $\kappa$ -light chain because 95% of all  
82 mouse B cells express *Igk* (Fig1.a). The efficiency of  $\kappa$  light chain deletion was  
83 measured by flow cytometry using the ratio of  $\kappa/\lambda$  cells to normalize for cell death due to  
84 BCR loss. The selected crRNAs consistently ablated  $Ig\kappa$  expression by 70 - 80 % of B  
85 cells as measured by flow cytometry or TIDE (Tracking the Indels by DEcomposition<sup>23</sup>)  
86 analysis (Fig.1 b-d).

87

88 To insert a transgene into the heavy chain locus we designed crRNAs specific for the  
89 first *Igh* intron immediately 3' of the endogenous  $VDJ_H$  gene segment, and 5' of the  $E\mu$   
90 enhancer. This position was selected to favor transgene expression and allow  
91 simultaneous disruption the endogenous heavy chain (see below and <sup>24</sup>). We tested 7  
92 crRNAs and selected a high-efficiency crRNA located 110 bp downstream of the  $J_{H4}$   
93 intron producing 77 % indels by the TIDE assay (Fig1e, Supplementary Fig.2a,b). This  
94 location also allowed for sufficient homology to introduce a transgene, irrespective of  
95 the upstream VDJ rearrangement.

96

97 The homology-directed repair template is composed of a splice acceptor (SA) stop  
98 cassette to terminate transcription of upstream rearranged  $VDJ_H$ , and a  $V_H$ -gene  
99 promoter followed by cDNAs encoding *Igk*, a P2A self-cleaving sequence, and  $IgV_H$  with  
100 a  $J_{H1}$  splice donor (SD) site (Fig.2a). This design disrupts expression of the  
101 endogenous locus, while encoding a transcription unit directing expression of the  
102 introduced heavy and light chain under control of endogenous *Igh* gene regulatory

103 elements. In addition, it preserves splicing of the transgenic IgV<sub>H</sub> into the endogenous  
104 constant regions allowing for expression of membrane and secreted forms of the  
105 antibody as wells as different isotypes by class switch recombination. Finally, correctly  
106 targeted cells are readily identified and enumerated by flow cytometry because they  
107 bind to cognate antigen.

108

109 A number of methods for producing ssDNA homology directed repair templates  
110 (HDRTs) were compared. The most reproducible and least cytotoxic involved digestion  
111 of plasmids with sequence-specific nickases, and ssDNA purification by agarose gel  
112 electrophoresis (Supplementary Fig. 3a-c,<sup>25, 26</sup>).

113

114 Co-transfection of the ssDNA template with pre-assembled Cas9 ribonucleoproteins  
115 (RNPs) containing the crRNAs resulted in expression of the encoded anti-HIV antibody  
116 in 0.1 - 0.4 % of mouse B cells by antigen-specific flow cytometry (TM4 core<sup>27, 28</sup> or  
117 10mut<sup>29</sup>) (Fig.2c,d). Transgene expression was stable over the entire culture period of 3  
118 days on feeder cells<sup>30</sup>, during which the overall number of B cells expanded by 6 to 20-  
119 fold (Fig.2e-h). However, expression of transgenic antibodies differed depending on the  
120 antibody and were generally reflective of their expression in knock-in mouse models  
121 (Fig.2c, f)<sup>16, 18, 28, 29, 31</sup>.

122

123 To determine whether edited cells are allelically excluded we transfected *Igh*<sup>a/b</sup> B cells  
124 with 3BNC60<sup>SI</sup>, a chimeric antibody composed of the mature heavy chain and germline

125 light chain of the anti-HIV bNAb 3BNC60 (Supplementary Fig.4b, c). The majority of  
126 edited cells expressing the 3BNC60<sup>SI</sup> transgene, expressed it using either *Igm<sup>a</sup>* or *Igm<sup>b</sup>*  
127 allele as determined by flow cytometry. Only 5.21 % of 3BNC60<sup>SI</sup>-expressing B cells  
128 showed co-expression of both IgM<sup>a</sup> and IgM<sup>b</sup> indicative of allelic inclusion of the  
129 endogenous allele or successful integration of the transgene into both alleles. Thus, the  
130 majority of edited B cells express only the transgene.

131

132 We conclude that mature mouse B cells can be edited *in vitro* to produce anti-HIV-1  
133 bNAbs from the *Igh* locus.

134

### 135 **Antibody gene editing in human B cells**

136 To determine whether this method could be adapted to edit human B cells we isolated  
137 them from peripheral blood of healthy volunteers and activated them using an anti-  
138 human RP105 antibody<sup>32</sup>. Analogous crRNAs were selected for targeting the human  
139 *IGKC* and the first intron 3' of *IGHJ6* (Fig.3a-d, Supplementary Fig.5a-b). The best  
140 *IGKC*-targeting crRNA caused 85 % of  $\kappa$ -bearing B cells to lose BCR expression,  
141 whereas  $\lambda$ -bearing cells increased proportionally indicating that they were unaffected.  
142 TIDE analysis of the J<sub>H</sub>6 intron sequences showed that the most efficient crRNA  
143 induced 64% indels. In conclusion, activation of human, primary B cells with anti-RP105  
144 allows efficient generation of indels using Cas9 RNPs.

145

146 To target bNAbs into the human J<sub>H</sub>6 intron we adapted the ssDNA HDRT and replaced  
147 mouse with human homology arms, the human C<sub>μ</sub> splice acceptor, the human *IGHV1-*  
148 *69* promoter, a codon-modified human *IGKC* constant region to avoid targeting by  
149 crRNAs and the human *J<sub>H</sub>4* splice donor (Fig 3a). In contrast to mouse cells, 2.9 – 4 %  
150 of λ<sup>-</sup> B cells expressed 3BNC60<sup>SI</sup> or 10-1074 antibodies respectively as determined by  
151 flow cytometry using the cognate antigen (Fig 3e,f). Thus, the efficiency of transgene  
152 integration is at least 10-times higher in human B cells. Furthermore, viability was also  
153 higher in human B cells, ranging from 60 to 85 % of live cells after transfection  
154 (Supplementary Fig.5c).

155

156 We conclude that primary human B cells can be edited by CRISPR/Cas9 to express  
157 anti-HIV bNAbs, and that this is significantly more efficient than in mouse B cells.

158

### 159 **Adoptive transfer of antibody-edited B cells**

160 To determine whether edited B cells can participate in immune responses, we  
161 adoptively transferred mouse 3BNC60<sup>SI</sup>-edited *Igh<sup>b</sup>* B cells, into congenically-marked  
162 *Igh<sup>a</sup>* wild type mice and immunized with the high-affinity, cognate antigen TM4 core in  
163 Ribi adjuvant (Fig.4a). Transgene-specific responses were detected using anti-idiotypic  
164 antibodies as an initial capture reagent in ELISA. Similar to endogenous humoral  
165 immune responses, transgenic antibodies were detected on day 7 after immunization,  
166 they peaked at day 14 and started to decrease by day 21 (Fig.4b, c). Importantly, the  
167 transgenic immune response included secondary isotypes indicating that the re-



168 engineered locus supports class switch recombination (Fig.4c). Finally, the magnitude  
169 of the response was directly correlated to the number of transferred cells. However,  
170 prolonged *in vitro* culture under the conditions tested decreased the efficiency of  
171 antibody production *in vivo* (Fig.4d).

172

173 To determine whether the transferred cells retained the ability to produce neutralizing  
174 antibodies we used B cells that were edited to produce 10-1074, a potent bNAbs, or  
175 3BNC60<sup>SI</sup> a chimeric antibody with limited neutralizing activity<sup>31, 33</sup>.  $4 \times 10^7$  transfected  
176 B cells were transferred into wild type Igh<sup>a</sup> mice that were subsequently immunized with  
177 the appropriate cognate antigen 10mut<sup>29</sup> or TM4 core<sup>16, 27, 28, 31</sup>. Serum IgG was purified  
178 from 3 mice each that received an estimated  $\sim 10^3$  edited B cells expressing 10-1074 or  
179 3BNC60<sup>SI</sup>. The serum antibodies were tested for neutralizing activity in the TZM-bl  
180 assay<sup>34</sup>. Two of the 3 mice that received 10-1074 edited cells showed IC<sub>50</sub>s of 21.59  
181  $\mu\text{g/mL}$  and a third reached 49 % neutralization at 118  $\mu\text{g/mL}$  (corresponding to  
182 approximately 1:500 and 1:100 dilution of serum, Fig.4e, Supplementary Fig.6a, b). As  
183 expected, neutralizing activity was not detected in mice receiving 3BNC60<sup>SI</sup> because  
184 this antibody is 2 - 3 orders of magnitude less potent against the tested viral strains than  
185 10-1074 (Supplementary Fig.6e).

186

187 We conclude that edited B cells can be recruited into immune responses and produce  
188 sufficient antibody to confer potentially protective levels of humoral immunity<sup>35</sup>.

189

## 190 Discussion

191 T cells can be reprogrammed to express specific receptors using retrogenic methods<sup>36-</sup>  
192 <sup>38</sup> or non-viral CRISPR/Cas9 genome targeting<sup>26</sup>. In contrast, B cell receptor  
193 reprogramming in primary cells using retroviruses has not been successful<sup>39</sup>. Moreover,  
194 although antibody heavy chains have been targeted into human B cells using  
195 CRISPR/Cas9<sup>40</sup>, little is known about how CRISPR/Cas9 genome targeting might be  
196 used to introduce complete antibody genes into mature B cells that retain the ability to  
197 participate in immune responses *in vivo*.

198  
199 We have developed a method to produce transgenic antibodies in primary mouse and  
200 human B cells using CRISPR/Cas9. The new method involves short term culture *in*  
201 *vitro*, silencing of the endogenous *Ig* genes, and insertion of a bi-cistronic cDNA into the  
202 *Igh* locus. Mouse B cells edited to express an anti-HIV-1 bNAbs by this method can  
203 produce transgenic antibody levels that are protective in animal models<sup>35, 41-43</sup>.

204  
205 Mouse and human B lymphocytes typically express a single antibody despite having the  
206 potential to express 2 different heavy chains and 4 different light chains. Theoretically  
207 the combination could produce 8 different antibodies and a series of additional chimeras  
208 that could interfere with the efficiency of humoral immunity and lead to unwanted  
209 autoimmunity. Allelic exclusion prevents this from happening and would need to be  
210 maintained by any gene replacement strategy used to edit B lymphocytes. In addition,

211 genetic editing is accompanied by safety concerns due to off-target double strand  
212 breaks and integrations.

213

214 The approach reported maintains allelic exclusion in part by ablating the *Igkc* gene. In  
215 the mouse, 95% of B cells express *Igkc*. In the absence of *Igkc* expression these cells  
216 will die by apoptosis because they cannot survive unless they continue to express a B  
217 cell receptor<sup>44, 45</sup>. Since the introduction of the transgene into the heavy chain locus  
218 disrupts endogenous *Igh* expression, editing maintains allelic exclusion because only  
219 cells expressing the introduced antibody can survive. Our strategy also interferes with  
220 the survival of cells that suffer off-target integration events, because such cells would be  
221 unable to express the B cell receptor and they too would die by apoptosis.

222

223 A potential issue is that there are two heavy chain alleles in every B cell and allelic  
224 exclusion would be disrupted if the transgene were only integrated in the non-productive  
225 *Igh* allele allowing for expression of the original productive *Igh*. However, our flow  
226 cytometry data indicates that this is a very rare event. Thus, either both alleles are  
227 targeted or the occasional remaining endogenous *Igh* gene is unable to pair with the  
228 transgenic *Igk*.

229

230 In contrast to the mouse, *IGL* is expressed by 45 % of all B cells in humans. Therefore,  
231 this locus would either need to be ablated, or alternatively, cells expressing *IGL* could

232 be removed from the transferred population by any one of a number of methods of  
233 negative selection.

234

235 Similar to antibody transgenes in mice, expression of the edited BCR varied between  
236 different antibodies. Some combinations of heavy and light chains were refractory to  
237 expression in mature B cells. In addition, although the level of B cell receptor expression  
238 was within the normal range, it was generally in the low end compared to polyclonal B  
239 cells. This is consistent with generally lower level expression of a similar transgene in  
240 knock-in mice<sup>24</sup>. Low BCR expression could also be due to the bi-cistronic design since  
241 expression was higher in knock-in mice that expressed the identical Ig from the native  
242 *Igk* and *Igh* loci<sup>31</sup>. Nevertheless, expression levels were adequate to drive antigen-  
243 induced antibody production *in vivo*.

244

245 bNAb mediated protection against infection with simian-human immunodeficiency  
246 viruses in macaques requires IC<sub>50</sub> neutralizing titers of 1:100<sup>35, 41-43</sup>. Thus the titers  
247 achieved by CRISPR/Cas9 edited B cells in mice would be protective if they could be  
248 translated to macaques and by inference humans. Moreover, our neutralization  
249 measurements may be an underestimate since we excluded bNAbs produced as IgM or  
250 isotypes other than IgG.

251

252 CAR T cell therapy typically involves transfer of millions of edited cells to achieve a  
253 therapeutic effect. Whether similar numbers of edited B cells would also be required to

254 achieve protective levels of humoral immunity can only be determined by further  
255 experimentation in primate models. In addition, the longevity of the antibody response  
256 produced by edited B cells, and its optimization by boosting or adjuvant choice will  
257 require further experimentation.

258

259 Most protective vaccine responses depend on humoral immunity. Neutralizing antibody  
260 responses are readily elicited for most human pathogens, but in some cases, including  
261 HIV-1, it has not yet been possible to do so. The alternatives include passive antibody  
262 infusion, which has been an effective means of protection since it was discovered at the  
263 turn of the last century. We have shown that passive transfer of mouse B cells edited by  
264 CRISPR/Cas9 can also produce protective antibody levels *in vivo*. This proof of concept  
265 study demonstrates that humoral immune responses can be engineered by  
266 CRISPR/Cas9. The approach is not limited to HIV-1 and can be applied to any disease  
267 requiring a specific antibody response.

268 **Methods**

269 **crRNA design**

270 crRNAs were designed with the MIT guide design tool ([crispr.mit.edu](http://crispr.mit.edu)), CHOPCHOP  
271 ([chopchop.cbu.uib.no](http://chopchop.cbu.uib.no)) and the IDT crRNA design tool ([www.idtdna.com](http://www.idtdna.com)). Designs were  
272 synthesized by IDT as Alt-R CRISPR-Cas9 crRNAs. crRNA sequences are listed in  
273 Supplementary Table 1.

274

275 **ssDNA HDRT preparation**

276 HDRT sequences, listed in Supplementary Table 2, were synthesized as gBlocks (IDT)  
277 and cloned using *NheI* and *XhoI* (NEB) into vector pLSODN-4D from the long ssDNA  
278 preparation kit (BioDynamics Laboratories, Cat.# DS620). ssDNA was prepared  
279 following the manufacturer's instructions with the following modifications: In brief, 2.4 mg  
280 sequence verified vector was digested at 2  $\mu\text{g}/\mu\text{L}$  in NEB 3.1 buffer with 1200 U  
281 *Nt.BspQI* for 1 h at 50 °C followed by addition of 2400 U *XhoI* (NEB) and incubation for  
282 1 h at 37 °C. Digests were desalted by ethanol precipitation and resuspended in water  
283 at < 1  $\mu\text{g}/\mu\text{L}$ . An equal volume of formamide gel-loading buffer (95 % de-ionized  
284 formamide, 0.025 % bromophenol blue, 0.025 % xylene cyanol, 0.025 % SDS, 18 mM  
285 EDTA) was added and heated to 70 °C for 5 min to denature dsDNA. Denatured  
286 samples were immediately loaded into dye-free 1 % agarose gels in TAE and run at 100  
287 V for 3 h. Correctly sized bands were identified by partial post-stain with GelRed  
288 (Biotium), then excised and column purified (Machery Nagel Cat.# 740610.20 or

289 740609.250) according to the manufacturer's instructions. Eluate was ethanol  
290 precipitated, resuspended in water, adjusted to 2.5  $\mu\text{g}/\mu\text{L}$  and stored at  $-20\text{ }^{\circ}\text{C}$ .

291

## 292 **Murine cell culture**

293 Mature, resting B cells were obtained from mouse spleens by forcing tissue through a 70  
294  $\mu\text{m}$  mesh into PBS containing 2 % heat-inactivated fetal bovine serum (FBS). After ACK  
295 lysis for 3 min, untouched B cells were enriched using anti-CD43 magnetic beads (MACS)  
296 according to manufacturer's protocol (Miltenyi Biotec) obtaining > 95 % purity.  $3.2 \times 10^7$   
297 cells/10 cm dish (Gibco) were cultured at  $37\text{ }^{\circ}\text{C}$  5 %  $\text{CO}_2$  in 10 mL mouse B cell medium  
298 consisting of RPMI-1640, supplemented with 10 % heat-inactivated FBS, 10 mM HEPES,  
299 antibiotic-antimycotic (1X), 1 mM sodium pyruvate, 2 mM L-glutamine and 53  $\mu\text{M}$  2-  
300 mercaptoethanol (all from Gibco) and activated with 2  $\mu\text{g}/\text{mL}$  anti-mouse RP105 clone  
301 RP/14 (produced in house or BD Pharmingen Cat.# 562191).

302

303 NB-21 feeder cells<sup>30</sup> were maintained in DMEM supplemented with 10 % heat-inactivated  
304 FBS and antibiotic-antimycotic (1X). For co-culture, feeder cells were irradiated with 80  
305 Gy and seeded simultaneously with B cells, 24 h after transfection, into B cell culture  
306 medium supplemented with 1 ng/mL recombinant mouse IL-4 (PeproTech Ca.# 214-14)  
307 and 2  $\mu\text{g}/\text{mL}$  anti-mouse RP105 clone RP/14.

## 308 **Human cell culture**

309 Frozen human leukapheresis samples were collected after signed informed consent in  
310 accordance with Institutional Review Board (IRB) approved protocol TSC-0910. Cells  
311 were thawed in a 37°C water bath and resuspended in human B cell medium composed  
312 of RPMI-1640, supplemented with 10 % heat-inactivated FBS or human serum, 10 mM  
313 HEPES, antibiotic-antimycotic (1X), 1 mM sodium pyruvate, 2 mM L-glutamine and 53  
314 µM 2-mercaptoethanol (all from Gibco). B cells were isolated using EasySep human  
315 naïve B cell Enrichment Kit (Stemcell Cat.# 19254) according to the manufacturer's  
316 instructions and cultured in the above medium supplemented with 2 µg/mL anti-human  
317 RP105 antibody clone MHR73-11 (BioLegend Cat.# 312907).

318

## 319 **RNP preparation and transfection**

320 Per 100 µL transfection, 1 µL of 200 µM crRNA and 1 µL 200 µM tracrRNA in duplex  
321 buffer (all IDT) were mixed, denatured at 95 °C for 5 min, re-natured for 5 min at room  
322 temperature. 5.6 µL PBS and 2.4 µL 61 µM Cas9 V3 (IDT, Cat.# 1081059) were added  
323 and incubated for 15 - 30 min. If required RNPs were mixed at the following ratios: 50 %  
324 crlgH, 25 % crlgK<sub>1</sub> and 25 % crlgK<sub>2</sub> (mouse) or 50% crlHgH<sub>3</sub> and 50 % crlHgK<sub>3</sub> (human).  
325 4 µL 100 µM electroporation enhancer in duplex buffer or 4 µL HDRT at 2.5 µg/µL were  
326 added to 10 µL mixed RNP and incubated for a further 1-2 min.

327

328 24 h after stimulation, activated mouse or human B cells were harvested, washed once  
329 in PBS and resuspended in Mouse B cell Nucleofector Solution with Supplement



330 (murine B cells) or Primary Cell Nucleofector Solution 3 with Supplement (human B  
331 cells) prepared to the manufacturer's instructions (Lonza) at a concentration of 4 - 5 ×  
332 10<sup>6</sup> cells / 86 μL. 86 μL cells were added to the RNP/HPRT mix, gently mixed by  
333 pipetting and transferred into nucleofection cuvettes and electroporated using an Amaxa  
334 Ilb machine setting Z-001 (murine B cells) or Amaxa 4D machine setting EH-140  
335 (human B cells). Cells were immediately transferred into 6-well dishes containing 5 mL  
336 prewarmed mouse or human B cell medium supplemented with the relevant anti-RP105  
337 antibody at 2 μg/mL and incubated at 37°C 5 % CO<sub>2</sub> for 24 h before further processing.

338

### 339 **TIDE assay**

340 Genomic DNA was extracted from 0.5 - 5 × 10<sup>5</sup> cells by standard phenol/chloroform  
341 extraction 24 - 42 h after transfection. PCRs to amplify human or mouse Ig loci targeted  
342 by CRISPR-Cas9 were performed using Phusion Green Hot Start II High-Fidelity  
343 polymerase (Thermo Fisher Cat.# F-537L) and primers listed in Supplementary Table 3.  
344 Thermocycler was set to 40 cycles, annealing at 65°C for 30 s and extending at 72°C  
345 for 30s. PCR product size was verified by gel electrophoresis, bands gel-extracted and  
346 sent for Sanger sequencing (Genewiz) using the relevant PCR primers. ab1 files were  
347 analyzed using the TIDE web tool ([tide.nki.nl](http://tide.nki.nl)) using samples receiving scramble or  
348 irrelevant HPRT-targeting crRNA as reference<sup>23</sup>.

## 349 **Flow cytometry**

350 Mouse spleens were forced through a 70  $\mu$ m mesh into FACS buffer (PBS containing 2  
351 % heat-inactivated FBS and 2 mM EDTA) and red blood cells were lysed in ACK lysing  
352 buffer (Gibco) for 3 min. Cultured cells were harvested by centrifugation. Then cells  
353 were washed and Fc-receptors blocked for 15 min on ice. Cells were stained for 20 min  
354 on ice with antibodies or reagents listed in Supplementary table 4 and depending on the  
355 stain, washed again and secondary stained for another 20 min on ice before acquisition  
356 on a BD LSRFortessa. GC B cells were gated as single/live, B220<sup>+</sup>, CD38<sup>-</sup> FAS<sup>+</sup>, GL7<sup>+</sup>,  
357 IgD<sup>-</sup>. Allotypic markers CD45.1 and CD45.2 were used to track adoptively transferred B  
358 cells.

359

## 360 **Mice**

361 C57BL/6J and B6.Igh<sup>a</sup> (B6.Cg-Gpi1<sup>a</sup> Thy1<sup>a</sup> Igh<sup>a</sup>/J) and B6.SJL were obtained from the  
362 Jackson Laboratory. Igh<sup>a/b</sup> mice were obtained by intercrossing B6.Igh<sup>a</sup> and B6.SJL mice.  
363 B1-8<sup>hi</sup> <sup>19</sup>, 3BNC60<sup>SI</sup> <sup>31</sup> and PGT121<sup>18, 29</sup> strains were generated and maintained in our  
364 laboratory. Experiments used age and sex-matched animals. All experiments were  
365 performed with authorization from the Institutional Review Board and the Rockefeller  
366 University IACUC.

367

## 368 **Cell transfers and immunizations**

369 After culture, mouse B cells were harvested at the indicated time points and  
370 resuspended in mouse B cell medium without anti-RP105 antibody and rested for 2 - 3

371 h at 37°C, 5 % CO<sub>2</sub>. Then cells were washed once in PBS and resuspended in 200 µL  
372 PBS/mouse containing the indicated number of initially transfected cells. 200 µL cell  
373 suspension/mouse were injected intravenously via the retroorbital sinus. Number of  
374 transferred, edited B cells was estimated as follows: Number of cells transfected × 20 %  
375 survival × 0.15 - 0.4 % transfection efficiency × 50 % handling/proliferation × 5 %  
376 transfer efficiency<sup>31</sup>. Mice were immunized intraperitoneally within 24 h after cell transfer  
377 with 200 µL containing 10 µg TM4 core<sup>27</sup> or 10mut<sup>29</sup> in PBS with 50 % Ribi (Sigma  
378 Adjuvant system, Sigma Aldrich) prepared to the manufacturer's instructions. Mice were  
379 bled at the indicated time points from the submandibular vein. Blood was allowed to clot  
380 and then serum was separated by centrifugation for 10 min at 20817 g. Serum was  
381 stored at -20°C.

382

### 383 **Anti-idiotypic antibody**

384 IgG producing hybridomas were isolated from mice immunized with iGL-VRC01 at the  
385 Frederick Hutchinson Cancer Research Center Antibody Technology Resource.  
386 Hybridoma supernatants were screened against a matrix of inferred germline (iGL)  
387 VRC01 class antibodies as well as irrelevant iGL-antibodies using a high throughput  
388 bead-based assay. One anti-idiotypic antibody, clone iv8, bound to additional VRC01  
389 class antibodies, but it also bound to a chimeric antibody with an iGL-VRC01 class light  
390 chain paired with the 8ANC131 heavy chain (which is derived from VH1-46), and to  
391 3BNC60<sup>SI</sup>.

392

## 393 **ELISAs**

394 For determination of 3BNC60<sup>SI</sup> levels, Corning 3690 half-well 96-well plates were  
395 coated overnight at 4°C with 25 µL/well of 2 µg/mL human anti-3BNC60<sup>SI</sup> (clone iv8)  
396 IgG in PBS, then blocked with 150 µL/well PBS 5% skimmed milk for 2 h at room  
397 temperature (RT). Sera were diluted to 1:50 with PBS and 7 subsequent 3-fold dilutions.  
398 Recombinant 3BNC60<sup>SI</sup> (produced in house as mouse IgG1, $\kappa$ ) was diluted to 10 µg/mL  
399 in PBS followed by six 5-fold dilutions. Blocked plates were washed 4-times with PBS  
400 0.05 % Tween 20 and incubated with 25 µL diluted sera or antibody for 2 h at RT.  
401 Binding was revealed by either anti-mouse IgG-horseradish peroxidase (HRP) (Jackson  
402 ImmunoResearch, Cat.# 115-035-071) or anti-mouse IgG1a-biotin (BD Pharmingen  
403 Cat.# 553500) or anti-mouse IgG1b-biotin (BD Pharmingen Cat.# 553533), all diluted  
404 1:5000 in PBS, 25 µL/well and incubation for 1 h at RT. Biotinylated antibodies were  
405 subsequently incubated with Streptavidin-HRP (BD Pharmingen Cat.# 554066), diluted  
406 1:1000 in PBS, 25 µL/well for 30 min at RT. Plates were washed 4-times with PBS 0.05  
407 % Tween 20 in between steps and 6 times before addition of substrate using a Tecan  
408 Hydrospeed microplate washer. HRP activity was determined using TMB as substrate  
409 (Thermo Scientific Cat.# 34021), adding 50 µL/well. Reactions were stopped with 50  
410 µL/well 2 M H<sub>2</sub>SO<sub>4</sub> and read at 450 and 570 nm on a FLUOstar Omega microplate  
411 reader (BMG Labtech). Data were analyzed with Microsoft Excel and GraphPad Prism  
412 6.0. Absolute 3BNC60<sup>SI</sup> titers were interpolated from sigmoidal fits of recombinant  
413 3BNC60<sup>SI</sup> standard curves.

414

415 For determination of NP-binding antibodies the following modifications applied. Plates  
416 were coated with 10  $\mu$ g/mL NP<sub>31</sub>-bovine serum albumin (BSA, Biosearch Technologies)  
417 and blocked with PBS 3 % BSA. Sera, antibodies and secondary reagents were diluted  
418 in PBS 1% BSA 0.05 % Tween20.

419

#### 420 **Neutralization assays**

421 Collected mouse serum was pooled and IgG purified using protein G Ab SpinTraps (GE  
422 Healthcare Cat.# 28-4083-47) then concentrated and buffer-exchanged into PBS using  
423 Amicon Ultra 30K centrifugal filter units (Merck Millipore Cat.# UFC503024) according to  
424 the manufacturers' instructions.

425 TZM-bl assays were performed as previously described<sup>34</sup>. Neutralizing activity was  
426 calculated as a function of the reduction in Tat-inducible luciferase expression in the  
427 TZM-bl reporter cell line in a single round of virus infection.

## 428 **Acknowledgements**

429 We would like to thank H.B. Gristick, J.R. Keefe and P.J. Bjorkman for providing 10mut  
430 protein and G. Kelsoe for providing NB-21 feeder cells. S. Tittley and T. Eisenreich for  
431 help with mouse colony management, T. Hägglöf and K. Yao for technical help, P. C.  
432 Rommel, E.E. Kara, E.S. Thientosapol, A.P. West Jr., G.D. Victora and all members of  
433 the Nussenzweig laboratory for discussion. This work was supported by the Bill and  
434 Melinda Gates Foundation Collaboration for AIDS Vaccine Discovery (CAVD) grants  
435 OPP1092074, OPP1124068, OPP1194977 (M.C.N.) and OPP1146996 (M.S.S.); NIH  
436 grants 1UM1 AI100663 and R01AI-129795 (M.C.N.); and the Robertson fund. H.H. was  
437 supported by the Cancer Research Institute Irvington Fellowship. M.C.N. is a Howard  
438 Hughes Medical Institute Investigator.

439

## 440 **Author contributions**

441 H.H. and M.J. conceived, planned and performed experiments, analyzed data, and wrote  
442 the manuscript. M.H. performed experiments and prepared ssDNA HDRT. P.D. assisted  
443 with experimental design and ELISAs. D.Y. and A.G. expressed antibodies. A.T.G., J.J.T.  
444 and L.S. designed and provided iv8 antibody. M.S.S. performed neutralization assays.  
445 M.C.N. planned and supervised experiments, analyzed data, and wrote the manuscript.

446

## 447 **Competing Interests statement**

448 There are patents on 3BNC117 and 10-1074 on which M.C.N. is an inventor. M.C.N. is  
449 a member of the Scientific Advisory Boards of Celldex and Frontier Biotechnologies.

## 450 **References**

- 451 1. Escolano, A., Dosenovic, P. & Nussenzweig, M.C. Progress toward active or  
452 passive HIV-1 vaccination. *J Exp Med* **214**, 3-16 (2017).
- 453 2. Nishimura, Y. & Martin, M.A. Of Mice, Macaques, and Men: Broadly Neutralizing  
454 Antibody Immunotherapy for HIV-1. *Cell Host Microbe* **22**, 207-216 (2017).
- 455 3. Sok, D. & Burton, D.R. Recent progress in broadly neutralizing antibodies to HIV.  
456 *Nat Immunol* **19**, 1179-1188 (2018).
- 457 4. Kwong, P.D. & Mascola, J.R. HIV-1 Vaccines Based on Antibody Identification, B  
458 Cell Ontogeny, and Epitope Structure. *Immunity* **48**, 855-871 (2018).
- 459 5. Ledgerwood, J.E. et al. Safety, pharmacokinetics and neutralization of the  
460 broadly neutralizing HIV-1 human monoclonal antibody VRC01 in healthy adults.  
461 *Clin Exp Immunol* **182**, 289-301 (2015).
- 462 6. Lynch, R.M. et al. Virologic effects of broadly neutralizing antibody VRC01  
463 administration during chronic HIV-1 infection. *Sci Transl Med* **7**, 319ra206 (2015).
- 464 7. Bar, K.J. et al. Effect of HIV Antibody VRC01 on Viral Rebound after Treatment  
465 Interruption. *N Engl J Med* **375**, 2037-2050 (2016).
- 466 8. Caskey, M. et al. Viraemia suppressed in HIV-1-infected humans by broadly  
467 neutralizing antibody 3BNC117. *Nature* **522**, 487-491 (2015).
- 468 9. Caskey, M. et al. Antibody 10-1074 suppresses viremia in HIV-1-infected  
469 individuals. *Nat Med* **23**, 185-191 (2017).
- 470 10. Mendoza, P. et al. Combination therapy with anti-HIV-1 antibodies maintains viral  
471 suppression. *Nature* **561**, 479-484 (2018).

- 472 11. Scheid, J.F. et al. HIV-1 antibody 3BNC117 suppresses viral rebound in humans  
473 during treatment interruption. *Nature* **535**, 556-560 (2016).
- 474 12. Schoofs, T. et al. HIV-1 therapy with monoclonal antibody 3BNC117 elicits host  
475 immune responses against HIV-1. *Science* **352**, 997-1001 (2016).
- 476 13. McCoy, L.E. et al. Potent and broad neutralization of HIV-1 by a llama antibody  
477 elicited by immunization. *J Exp Med* **209**, 1091-1103 (2012).
- 478 14. Sok, D. et al. Rapid elicitation of broadly neutralizing antibodies to HIV by  
479 immunization in cows. *Nature* **548**, 108-111 (2017).
- 480 15. Briney, B. et al. Tailored Immunogens Direct Affinity Maturation toward HIV  
481 Neutralizing Antibodies. *Cell* **166**, 1459-1470.e1411 (2016).
- 482 16. Dosenovic, P. et al. Immunization for HIV-1 Broadly Neutralizing Antibodies in  
483 Human Ig Knockin Mice. *Cell* **161**, 1505-1515 (2015).
- 484 17. Tian, M. et al. Induction of HIV Neutralizing Antibody Lineages in Mice with  
485 Diverse Precursor Repertoires. *Cell* **166**, 1471-1484.e1418 (2016).
- 486 18. Escolano, A. et al. Sequential Immunization Elicits Broadly Neutralizing Anti-HIV-  
487 1 Antibodies in Ig Knockin Mice. *Cell* **166**, 1445-1458.e1412 (2016).
- 488 19. Shih, T.A., Roederer, M. & Nussenzweig, M.C. Role of antigen receptor affinity in  
489 T cell-independent antibody responses in vivo. *Nat Immunol* **3**, 399-406 (2002).
- 490 20. Pernis, B., Chiappino, G., Kelus, A.S. & Gell, P.G. Cellular localization of  
491 immunoglobulins with different allotypic specificities in rabbit lymphoid tissues. *J*  
492 *Exp Med* **122**, 853-876 (1965).



- 493 21. Cebra, J.J., Colberg, J.E. & Dray, S. Rabbit lymphoid cells differentiated with  
494 respect to alpha-, gamma-, and mu- heavy polypeptide chains and to allotypic  
495 markers Aa1 and Aa2. *J Exp Med* **123**, 547-558 (1966).
- 496 22. Nussenzweig, M.C. et al. Allelic exclusion in transgenic mice that express the  
497 membrane form of immunoglobulin mu. *Science* **236**, 816-819 (1987).
- 498 23. Brinkman, E.K., Chen, T., Amendola, M. & van Steensel, B. Easy quantitative  
499 assessment of genome editing by sequence trace decomposition. *Nucleic Acids*  
500 *Res* **42**, e168 (2014).
- 501 24. Jacobsen, J.T. et al. One-step generation of monoclonal B cell receptor mice  
502 capable of isotype switching and somatic hypermutation. *J Exp Med* **215**, 2686-  
503 2695 (2018).
- 504 25. Yoshimi, K. et al. ssODN-mediated knock-in with CRISPR-Cas for large genomic  
505 regions in zygotes. *Nat Commun* **7**, 10431 (2016).
- 506 26. Roth, T.L. et al. Reprogramming human T cell function and specificity with non-  
507 viral genome targeting. *Nature* **559**, 405-409 (2018).
- 508 27. McGuire, A.T. et al. HIV antibodies. Antigen modification regulates competition of  
509 broad and narrow neutralizing HIV antibodies. *Science* **346**, 1380-1383 (2014).
- 510 28. McGuire, A.T. et al. Specifically modified Env immunogens activate B-cell  
511 precursors of broadly neutralizing HIV-1 antibodies in transgenic mice. *Nat*  
512 *Commun* **7**, 10618 (2016).

- 513 29. Steichen, J.M. et al. HIV Vaccine Design to Target Germline Precursors of  
514 Glycan-Dependent Broadly Neutralizing Antibodies. *Immunity* **45**, 483-496  
515 (2016).
- 516 30. Kuraoka, M. et al. Complex Antigens Drive Permissive Clonal Selection in  
517 Germinal Centers. *Immunity* **44**, 542-552 (2016).
- 518 31. Dosenovic, P. et al. Anti-HIV-1 B cell responses are dependent on B cell  
519 precursor frequency and antigen-binding affinity. *Proc Natl Acad Sci U S A* **115**,  
520 4743-4748 (2018).
- 521 32. Miura, Y. et al. RP105 is associated with MD-1 and transmits an activation signal  
522 in human B cells. *Blood* **92**, 2815-2822 (1998).
- 523 33. Mouquet, H. et al. Complex-type N-glycan recognition by potent broadly  
524 neutralizing HIV antibodies. *Proc Natl Acad Sci U S A* **109**, E3268-3277 (2012).
- 525 34. Montefiori, D.C. Evaluating neutralizing antibodies against HIV, SIV, and SHIV in  
526 luciferase reporter gene assays. *Curr Protoc Immunol* **Chapter 12**, Unit 12.11  
527 (2005).
- 528 35. Shingai, M. et al. Passive transfer of modest titers of potent and broadly  
529 neutralizing anti-HIV monoclonal antibodies block SHIV infection in macaques. *J*  
530 *Exp Med* **211**, 2061-2074 (2014).
- 531 36. Eyquem, J. et al. Targeting a CAR to the TRAC locus with CRISPR/Cas9  
532 enhances tumour rejection. *Nature* **543**, 113-117 (2017).
- 533 37. Sadelain, M., Rivière, I. & Riddell, S. Therapeutic T cell engineering. *Nature* **545**,  
534 423-431 (2017).

- 535 38. Lim, W.A. & June, C.H. The Principles of Engineering Immune Cells to Treat  
536 Cancer. *Cell* **168**, 724-740 (2017).
- 537 39. Freitag, J. et al. Towards the generation of B-cell receptor retrogenic mice. *PLoS*  
538 *One* **9**, e109199 (2014).
- 539 40. Voss, J.E. et al. Reprogramming the antigen specificity of B cells using genome-  
540 editing technologies. *Elife* **8** (2019).
- 541 41. Mascola, J.R. et al. Protection of Macaques against pathogenic simian/human  
542 immunodeficiency virus 89.6PD by passive transfer of neutralizing antibodies. *J*  
543 *Virology* **73**, 4009-4018 (1999).
- 544 42. Shibata, R. et al. Neutralizing antibody directed against the HIV-1 envelope  
545 glycoprotein can completely block HIV-1/SIV chimeric virus infections of  
546 macaque monkeys. *Nat Med* **5**, 204-210 (1999).
- 547 43. Parren, P.W. et al. Antibody protects macaques against vaginal challenge with a  
548 pathogenic R5 simian/human immunodeficiency virus at serum levels giving  
549 complete neutralization in vitro. *J Virology* **75**, 8340-8347 (2001).
- 550 44. Kraus, M., Alimzhanov, M.B., Rajewsky, N. & Rajewsky, K. Survival of resting  
551 mature B lymphocytes depends on BCR signaling via the Igalpha/beta  
552 heterodimer. *Cell* **117**, 787-800 (2004).
- 553 45. Lam, K.P., Kühn, R. & Rajewsky, K. In vivo ablation of surface immunoglobulin  
554 on mature B cells by inducible gene targeting results in rapid cell death. *Cell* **90**,  
555 1073-1083 (1997).
- 556

557 **Figures**

Fig. 1

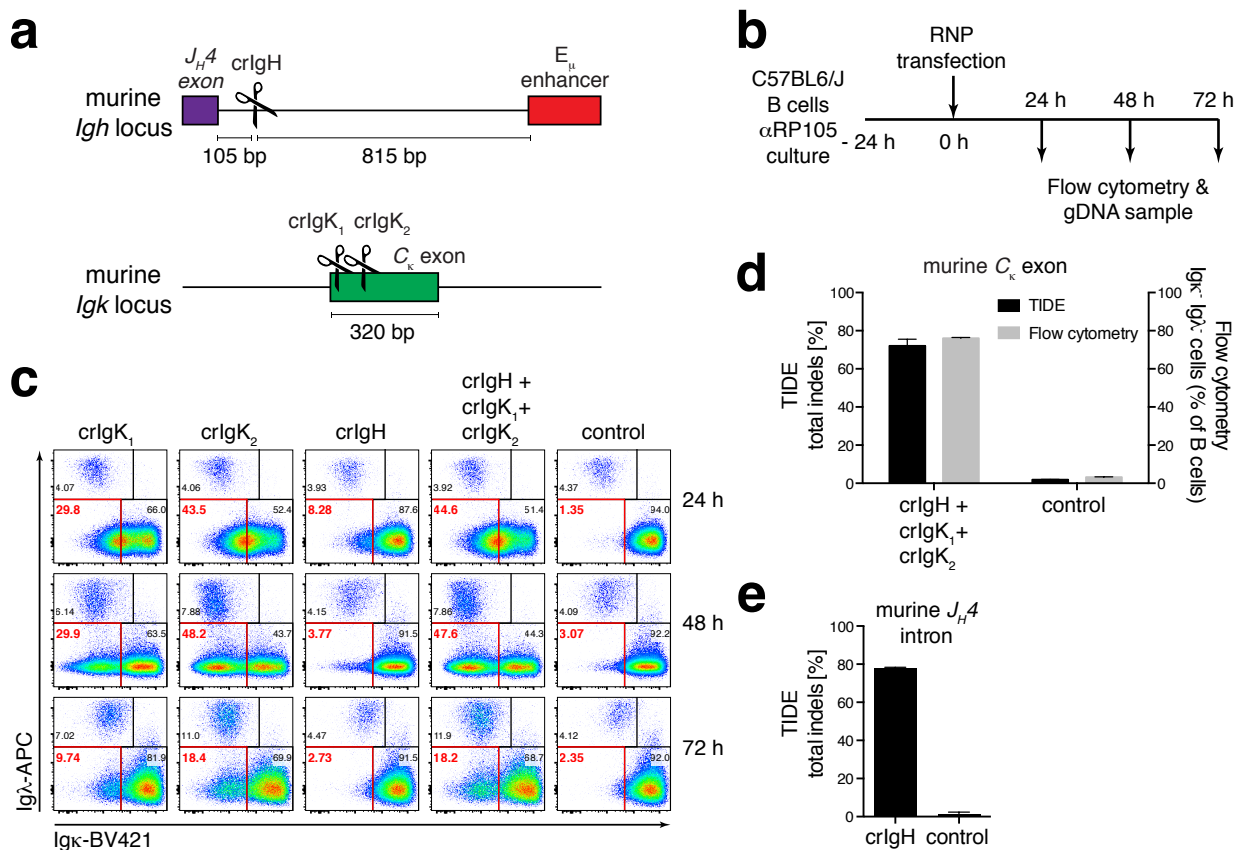

558

559 **Figure 1: Efficient generation of indels in primary mouse B cells by CRISPR/Cas9.**

560 **(a)** Targeting scheme for *Igh* (crlgH) and *Igk* crRNA guides (crlgK<sub>1</sub>, crlgK<sub>2</sub>). **(b)**

561 Experimental set up for (c-e). Primary mouse B cells were cultured for 24 h in the

562 presence of anti-RP105 antibody and then transfected with Cas9 ribonucleoproteins

563 (RNPs) and analyzed at the indicated time points. **(c)** Flow cytometric plots of cultured B

564 cells at the indicated time points after transfection. Control uses an irrelevant crRNA

565 targeting the HPRT gene. **(d)** Quantification of (c), percentage of Igk<sup>-</sup> Igλ<sup>-</sup> B cells by flow

566 cytometry (right y-axis) and percentage of cells containing indels in the *Igkc* exon by

567 TIDE analysis (left y-axis). Control bars include irrelevant HPRT-targeting crRNAs or a

568 scramble crRNA without known targets in the mouse genome. **(e)** Percentage of cells  
569 containing indels in the J<sub>H</sub>4 intron by TIDE analysis after targeting with crIgH or control.  
570 Bars indicate mean  $\pm$  SEM in two (TIDE) or four (flow cytometry) independent  
571 experiments.

Fig. 2

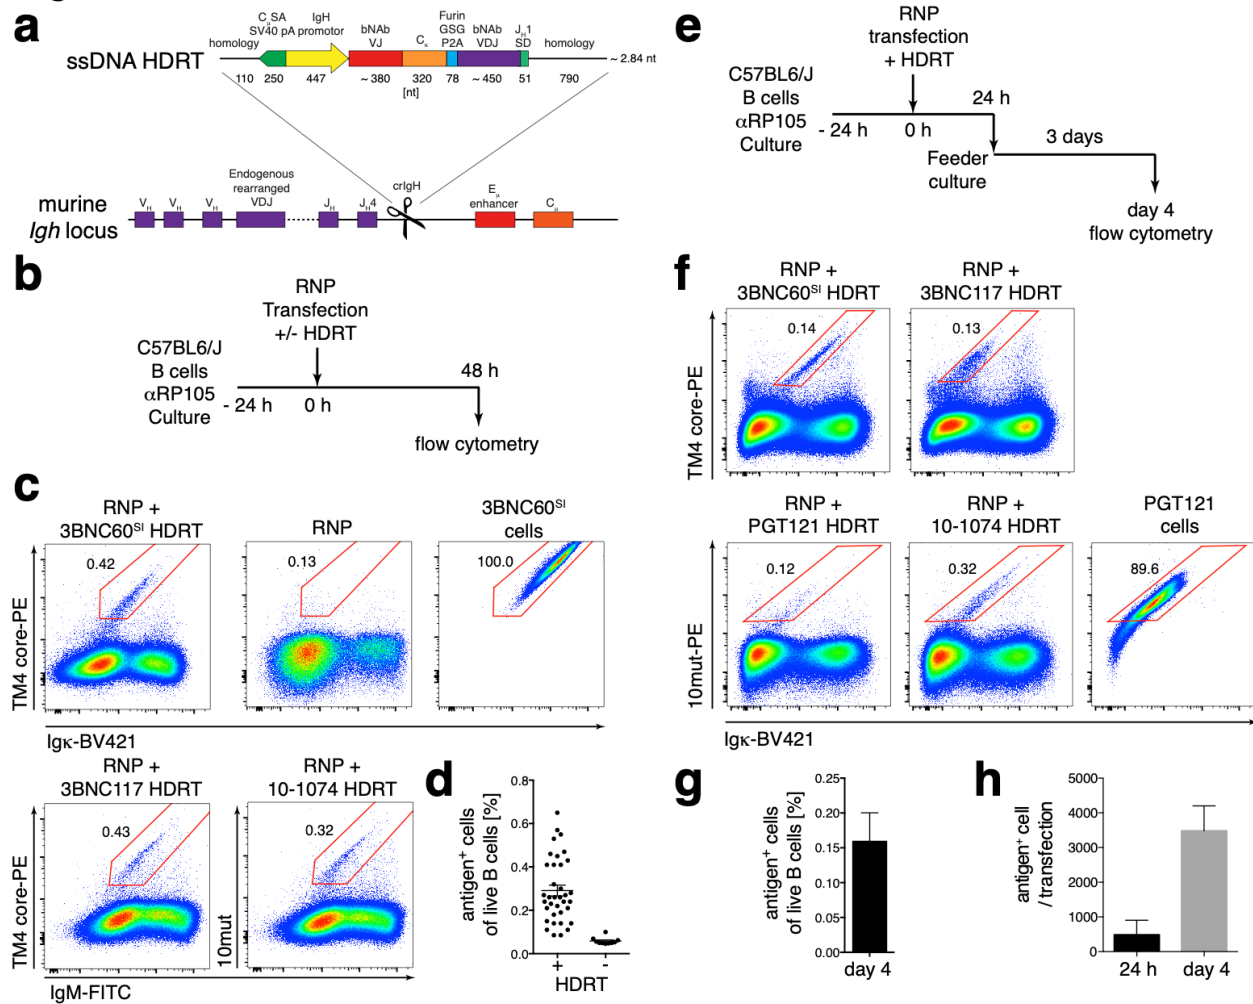

572

573 **Figure 2: Engineering bNAb-expressing, primary, mouse B cells.**

574 **(a)** Schematic representation of the targeting strategy to create bNAb-expressing,  
 575 primary mouse B cells. ssDNA homology-directed repair template (HDRT) contained  
 576 110 nt 5' and 790 nt 3' homology arms flanking an expression cassette. The 5'  
 577 homology arm is followed by the 111 nt long splice acceptor site and the first 2 codons  
 578 of C<sub>μ</sub> exon 1, a stop codon and a SV40 polyadenylation signal (C<sub>μ</sub>SA SV40 pA). Then  
 579 the mouse *Ighv4-9* gene promoter, the leader, variable and joining regions (VJ) of the  
 580 respective antibody light chain and mouse κ constant region (C<sub>κ</sub>) are followed by a furin-

581 cleavage site, a GSG-linker and a P2A self-cleaving oligopeptide sequence (P2A), the  
582 leader, variable, diversity and joining regions (VDJ) of the respective antibody heavy  
583 chain and 45 nt of the mouse J<sub>H</sub>1 intron splice donor site to splice into downstream  
584 constant regions. **(b)** Experimental setup for (c). **(c)** Flow cytometric plots of primary,  
585 mouse B cells, activated and transfected with RNPs targeting the *Igh* J<sub>H</sub>4 intron and  
586 *Igkc* exon with or without ssDNA HDRTs encoding the 3BNC60<sup>SI</sup>, 3BNC117 or 10-1074  
587 antibody. Non-transfected, antigen-binding B cells from 3BNC60<sup>SI</sup> knock-in mice  
588 cultured the same way are used as control for gating. **(d)** Quantification of (c). Each dot  
589 represents one transfection. Data from 7 independent experiments. **(e)** Experimental set  
590 up for (f-h) **(f)** Flow cytometric plots of primary, mouse B cells, activated and transfected  
591 using ssDNA HDRT encoding the antibodies 3BNC60<sup>SI</sup>, 3BNC117, PGT121 or 10-1074.  
592 B cells were expanded on feeder cells for 3 days. Cultured, non-transfected, antigen-  
593 binding B cells from PGT121 knock-in mice are shown for gating. **(g)** Quantification of  
594 (f). **(h)** Total number of antigen binding B cells before (24 h) or after 3 days (day 4) of  
595 feeder culture. Bars indicate mean  $\pm$  SEM of combined data from 2 independent  
596 experiments.  
597

Fig. 3

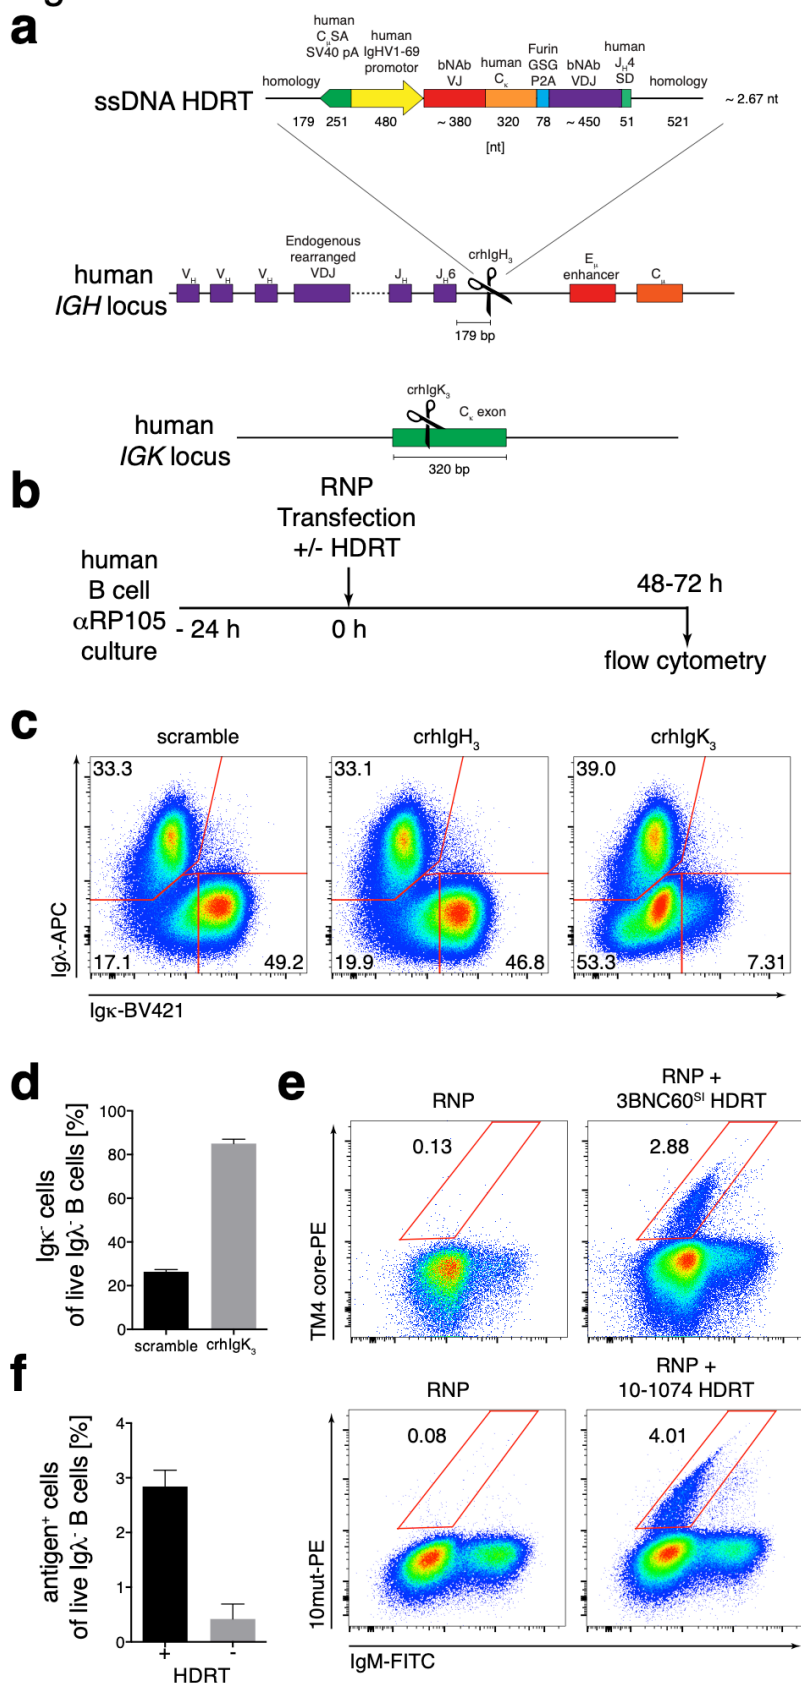



599 **Figure 3: Engineering bNAb-expressing, primary, human B cells.**

600 **(a)** Schematic representation of the targeting strategy to create bNAb-expressing,  
601 primary human B cells. The ssDNA HDRT is flanked by 179 nt and a 521 nt homology  
602 arms. The central expression cassette contains 112 nt of the human splice acceptor site  
603 and the first 2 codons of C $\mu$  exon 1, a stop codon and a SV40 polyadenylation signal  
604 (C $\mu$ SA SV40 pA). Then the human *IGHV1-69* gene promoter, the leader, variable and  
605 joining regions (VJ) of the respective antibody light chain and human  $\kappa$  constant region  
606 (C $\kappa$ ) are followed by a furin-cleavage site, a GSG-linker and a P2A self-cleaving  
607 oligopeptide sequence (P2A), the leader, variable, diversity and joining regions (VDJ) of  
608 the respective antibody heavy chain and 50 nt of the human J<sub>H4</sub> intron splice donor site  
609 to splice into downstream constant regions. **(b)** Experimental set up for c,d. Primary  
610 human B cells were cultured for 24 h in the presence of anti-RP105 antibody and then  
611 transfected with RNPs  $\pm$  HDRT. **(c)** Flow cytometric plots of primary human B cells 48 h  
612 after transfection with RNPs containing crRNAs without target (scramble) or targeting  
613 the *IGHJ6* intron or the *IGKC* exon. **(d)** Quantification of (c). Combined data from 3  
614 independent experiments is shown. **(e)** Flow cytometric plots of antigen binding by Ig $\lambda$ <sup>-</sup>  
615 primary human B cells 72 h after transfection of RNPs targeting both the *IGHJ6* intron  
616 and the *IGKC* exon with or without HDRTs encoding 3BNC60<sup>SI</sup> or 10-1074. **(f)**  
617 Quantification of (e). Bars indicate mean  $\pm$  SEM of combined data from 2 independent  
618 experiments with 2 - 4 replicates each.

Fig. 4

**a**

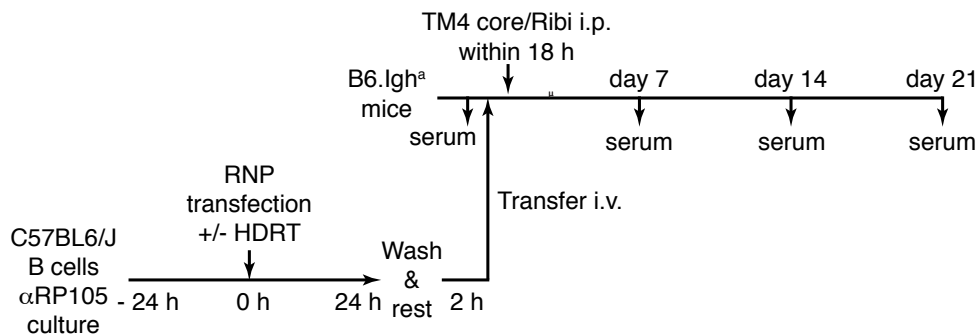

**b**

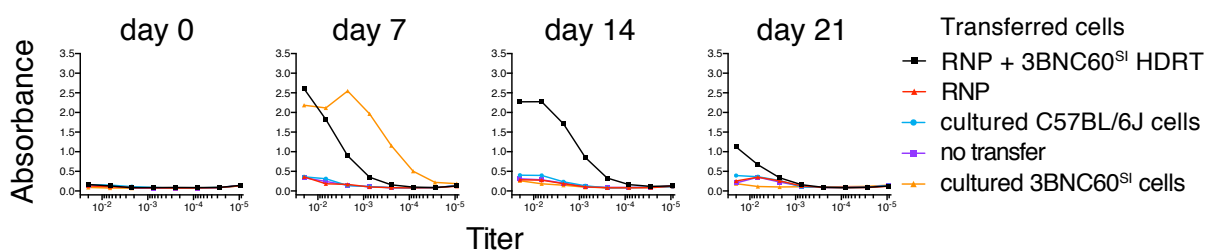

**c**

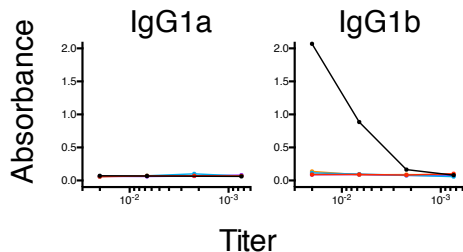

**d**

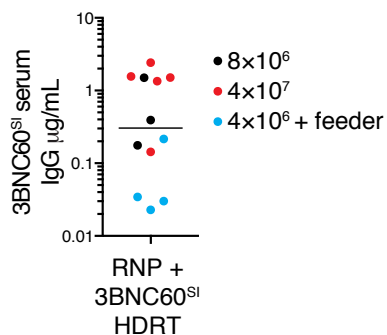

**e**

| Sample                            | Virus | Titer in TZM.bl cells ( $\mu$ g/mL) |                  |                  |                  |
|-----------------------------------|-------|-------------------------------------|------------------|------------------|------------------|
|                                   |       | T250.4                              |                  | Q23.17           |                  |
|                                   |       | IC <sub>50</sub>                    | IC <sub>80</sub> | IC <sub>50</sub> | IC <sub>80</sub> |
| RNP + 10-1074 HDRT mouse 1        |       | 24.04                               | 69.49            | 82.24            | >112             |
| RNP + 10-1074 HDRT mouse 2        |       | 21.59                               | 66.51            | 68.04            | >150             |
| RNP + 10-1074 HDRT mouse 3        |       | >118                                | >118             | >118             | >118             |
| recombinant 10-1074 ( $\mu$ g/mL) |       | <0.005                              | 0.009            | <0.005           | 0.016            |

619

620 **Figure 4: Engineered bNAbs-expressing, primary, mouse B cells participate in**

621 **humoral immune responses *in vivo*.**

622 **(a)** Experimental set up for (b-e). i.v. intravenous; i.p. intraperitoneal. **(b)** Anti-3BNC60<sup>SI</sup>

623 idiotypic-coated, mouse IgG ELISA of sera from mice adoptively transferred with the

624 indicated B cells and immunized with the cognate antigen TM4 core at the indicated

625 time points. Representative plots of 7 independent experiments. **(c)** Anti-3BNC60<sup>SI</sup>  
626 idiotype-coated, mouse IgG1<sup>a</sup> or IgG1<sup>b</sup> ELISA of day 14 sera, as above. Representative  
627 plots of 2 independent experiments. **(d)** 3BNC60<sup>SI</sup> serum IgG levels 14 days after  
628 immunization in mice transferred with 3BNC60<sup>SI</sup>-edited cells, numbers of total B  
629 cells/mouse at transfection are indicated. Cells were transferred either 24 h after  
630 transfection or after additional culture on feeder cells as in Fig.2d. Determined by anti-  
631 3BNC60<sup>SI</sup> idiotype-coated, mouse IgG ELISA over 7 independent experiments. Each  
632 dot represents one mouse. **(e)** TZM.bl neutralization data of protein G-purified serum  
633 immunoglobulin days 14 – 21 after immunization from mice treated as in (a) but  
634 transfected with 10-1074 HDRT and immunized with cognate antigen 10mut. Combined  
635 data from 2 independent experiments are shown.
